# Supplementary material
Source: publisher figshare collection journal article supplement (https://acs.figshare.com/ndownloader/files/5149255)
Supplement: Supplementary file 1 [file 5149255]

data_complex3
 
_audit_creation_method            SHELXL-97 
_chemical_name_systematic 
; 
 ? 
; 
_chemical_name_common             ? 
_chemical_formula_moiety          'C22 H25 Cl2 N3 Ru' 
_chemical_formula_sum 
 'C22 H25 Cl2 N3 Ru' 
_chemical_formula_weight          503.42 
 
loop_ 
 _atom_type_symbol 
 _atom_type_description 
 _atom_type_scat_dispersion_real 
 _atom_type_scat_dispersion_imag 
 _atom_type_scat_source 
 'C'  'C'   0.0033   0.0016 
 'International Tables Vol C Tables 4.2.6.8 and 6.1.1.4' 
 'H'  'H'   0.0000   0.0000 
 'International Tables Vol C Tables 4.2.6.8 and 6.1.1.4' 
 'N'  'N'   0.0061   0.0033 
 'International Tables Vol C Tables 4.2.6.8 and 6.1.1.4' 
 'Cl'  'Cl'   0.1484   0.1585 
 'International Tables Vol C Tables 4.2.6.8 and 6.1.1.4' 
 'Ru'  'Ru'  -1.2594   0.8363 
 'International Tables Vol C Tables 4.2.6.8 and 6.1.1.4' 
 
_symmetry_cell_setting            'Monoclinic' 
_symmetry_space_group_name_H-M    'P21/c'  
 
loop_ 
 _symmetry_equiv_pos_as_xyz 
 'x, y, z' 
 '-x, y+1/2, -z+1/2' 
 '-x, -y, -z' 
 'x, -y-1/2, z-1/2' 
 
_cell_length_a                    12.2560(11) 
_cell_length_b                    12.8320(13) 
_cell_length_c                    14.361(2) 
_cell_angle_alpha                 90.000(10) 
_cell_angle_beta                  104.162(9) 
_cell_angle_gamma                 90.000(8) 
_cell_volume                      2189.9(4) 
_cell_formula_units_Z             4 
_cell_measurement_temperature     293(2) 
_cell_measurement_reflns_used     ? 
_cell_measurement_theta_min       ? 
_cell_measurement_theta_max       ? 
 
_exptl_crystal_description        'plate' 
_exptl_crystal_colour             'orange' 
_exptl_crystal_size_max          0.40 
_exptl_crystal_size_mid           0.32 
_exptl_crystal_size_min           0.22 
_exptl_crystal_density_meas       ? 
_exptl_crystal_density_diffrn     1.527 
_exptl_crystal_density_method     'not measured' 
_exptl_crystal_F_000              1024 
_exptl_absorpt_coefficient_mu     0.972 
_exptl_absorpt_correction_type    'psi-scan'  
_exptl_absorpt_correction_T_min   ? 
_exptl_absorpt_correction_T_max   ? 
 
_exptl_special_details 
; 
 ? 
; 
 
_diffrn_ambient_temperature       293(2) 
_diffrn_radiation_wavelength      0.70930 
_diffrn_radiation_type            'MoK\a'  
_diffrn_radiation_source          'fine-focus sealed tube' 
_diffrn_radiation_monochromator   graphite 
_diffrn_measurement_device_type   'Enraf-Nonius CAD-4' 
_diffrn_measurement_method        '\w/2\q' 
_diffrn_detector_area_resol_mean  ? 
_diffrn_standards_number          ? 
_diffrn_standards_interval_count  ? 
_diffrn_standards_interval_time   ? 
_diffrn_standards_decay_%         3  
_diffrn_reflns_number             3626 
_diffrn_reflns_av_R_equivalents   0.0000 
_diffrn_reflns_av_sigmaI/netI     0.0164 
_diffrn_reflns_limit_h_min        0 
_diffrn_reflns_limit_h_max        14 
_diffrn_reflns_limit_k_min        0 
_diffrn_reflns_limit_k_max        15 
_diffrn_reflns_limit_l_min        -17 
_diffrn_reflns_limit_l_max        16 
_diffrn_reflns_theta_min          1.71 
_diffrn_reflns_theta_max          24.92 
_reflns_number_total              3626 
_reflns_number_gt                 3382 
_reflns_threshold_expression      >2sigma(I) 
 
_computing_data_collection        'Argus (Nonius, MACH3 software)' 
_computing_cell_refinement        'Argus (Nonius, MACH3 software)'  
_computing_data_reduction         'Maxus (Nonius software)' 
_computing_structure_solution     'SHELXS-97 (Sheldrick, 1990)' 
_computing_structure_refinement   'SHELXL-97 (Sheldrick, 1997)' 
_computing_molecular_graphics     'ORTEP-32 (Faruggia, 1997)' 
_computing_publication_material   'SHELXL-97 (Sheldrick, 1997)' 
 
_refine_special_details 
; 
 Refinement of F^2^ against ALL reflections.  The weighted R-factor wR and 
 goodness of fit S are based on F^2^, conventional R-factors R are based 
 on F, with F set to zero for negative F^2^. The threshold expression of 
 F^2^ > 2sigma(F^2^) is used only for calculating R-factors(gt) etc. and is 
 not relevant to the choice of reflections for refinement.  R-factors based 
 on F^2^ are statistically about twice as large as those based on F, and R- 
 factors based on ALL data will be even larger. 
; 
 
_refine_ls_structure_factor_coef  Fsqd  
_refine_ls_matrix_type            full 
_refine_ls_weighting_scheme 
 'calc w=1/[\s^2^(Fo^2^)+(0.0412P)^2^+1.0678P] where P=(Fo^2^+2Fc^2^)/3' 
_atom_sites_solution_primary      direct 
_atom_sites_solution_secondary    difmap 
_atom_sites_solution_hydrogens    geom 
_refine_ls_hydrogen_treatment     mixed 
_refine_ls_extinction_method      none 
_refine_ls_extinction_coef        ? 
_refine_ls_number_reflns          3626 
_refine_ls_number_parameters      259 
_refine_ls_number_restraints      0 
_refine_ls_R_factor_all           0.0293 
_refine_ls_R_factor_gt            0.0262 
_refine_ls_wR_factor_ref          0.0723 
_refine_ls_wR_factor_gt           0.0695 
_refine_ls_goodness_of_fit_ref    1.120 
_refine_ls_restrained_S_all       1.120 
_refine_ls_shift/su_max           0.000 
_refine_ls_shift/su_mean          0.000 
 
loop_ 
 _atom_site_label 
 _atom_site_type_symbol 
 _atom_site_fract_x 
 _atom_site_fract_y 
 _atom_site_fract_z 
 _atom_site_U_iso_or_equiv 
 _atom_site_adp_type 
 _atom_site_occupancy 
 _atom_site_calc_flag 
 _atom_site_refinement_flags 
 _atom_site_disorder_assembly 
 _atom_site_disorder_group 
Ru Ru 0.785800(15) 0.584880(15) 0.101230(14) 0.03123(9) Uani 1 d . . . 
Cl1 Cl 0.82089(6) 0.60544(6) 0.27339(5) 0.04602(17) Uani 1 d . . . 
Cl2 Cl 0.95192(6) 0.47561(6) 0.12865(5) 0.04777(18) Uani 1 d . . . 
N1 N 0.89955(18) 0.71059(17) 0.10508(16) 0.0388(5) Uani 1 d . . . 
N2 N 1.02531(19) 0.81326(17) 0.06701(17) 0.0418(5) Uani 1 d . . . 
N3 N 1.4222(3) 0.9901(3) -0.1467(3) 0.0849(10) Uani 1 d . . . 
C1 C 0.7496(3) 0.6312(3) -0.1372(2) 0.0570(8) Uani 1 d . . . 
H1A H 0.8188 0.5953 -0.1357 0.085 Uiso 1 calc R . . 
H1B H 0.7630 0.7050 -0.1336 0.085 Uiso 1 calc R . . 
H1C H 0.6954 0.6150 -0.1959 0.085 Uiso 1 calc R . . 
C2 C 0.7657(3) 0.4138(3) -0.0805(3) 0.0588(8) Uani 1 d . . . 
H2A H 0.7147 0.3982 -0.1411 0.088 Uiso 1 calc R . . 
H2B H 0.7838 0.3509 -0.0438 0.088 Uiso 1 calc R . . 
H2C H 0.8333 0.4438 -0.0914 0.088 Uiso 1 calc R . . 
C3 C 0.6804(3) 0.3430(3) 0.0844(3) 0.0679(10) Uani 1 d . . . 
H3A H 0.6535 0.3342 0.1413 0.102 Uiso 1 calc R . . 
H3B H 0.7584 0.3238 0.0977 0.102 Uiso 1 calc R . . 
H3C H 0.6377 0.2994 0.0342 0.102 Uiso 1 calc R . . 
C4 C 0.5704(3) 0.4936(4) 0.1861(2) 0.0696(11) Uani 1 d . . . 
H4A H 0.5726 0.4189 0.1898 0.104 Uiso 1 calc R . . 
H4B H 0.4941 0.5170 0.1767 0.104 Uiso 1 calc R . . 
H4C H 0.6154 0.5224 0.2447 0.104 Uiso 1 calc R . . 
C5 C 0.5628(3) 0.7151(3) 0.1356(3) 0.0726(11) Uani 1 d . . . 
H5A H 0.5815 0.7846 0.1204 0.109 Uiso 1 calc R . . 
H5B H 0.5933 0.7021 0.2028 0.109 Uiso 1 calc R . . 
H5C H 0.4824 0.7075 0.1207 0.109 Uiso 1 calc R . . 
C6 C 0.6529(3) 0.7859(3) -0.0278(3) 0.0712(10) Uani 1 d . . . 
H6A H 0.6044 0.7950 -0.0908 0.107 Uiso 1 calc R . . 
H6B H 0.7275 0.8087 -0.0278 0.107 Uiso 1 calc R . . 
H6C H 0.6250 0.8264 0.0176 0.107 Uiso 1 calc R . . 
C7 C 0.7052(2) 0.5973(2) -0.05318(19) 0.0390(6) Uani 1 d . . . 
C8 C 0.7109(2) 0.4906(2) -0.02574(19) 0.0397(6) Uani 1 d . . . 
C9 C 0.6672(2) 0.4560(2) 0.0528(2) 0.0412(6) Uani 1 d . . . 
C10 C 0.6163(2) 0.5290(3) 0.1027(2) 0.0448(7) Uani 1 d . . . 
C11 C 0.6117(2) 0.6379(2) 0.0772(2) 0.0453(7) Uani 1 d . . . 
C12 C 0.6558(2) 0.6715(2) -0.0001(2) 0.0421(6) Uani 1 d . . . 
C13 C 0.9654(2) 0.7239(2) 0.0459(2) 0.0401(6) Uani 1 d . . . 
H13 H 0.9701 0.6784 -0.0034 0.048 Uiso 1 calc R . . 
C14 C 0.9179(3) 0.7947(2) 0.1669(2) 0.0512(7) Uani 1 d . . . 
H14 H 0.8821 0.8060 0.2162 0.061 Uiso 1 calc R . . 
C15 C 0.9959(3) 0.8579(2) 0.1448(2) 0.0534(8) Uani 1 d . . . 
H15 H 1.0242 0.9193 0.1758 0.064 Uiso 1 calc R . . 
C16 C 1.1066(2) 0.8528(2) 0.0197(2) 0.0407(6) Uani 1 d . . . 
C17 C 1.0861(2) 0.8492(3) -0.0792(2) 0.0515(7) Uani 1 d . . . 
H17 H 1.0191 0.8212 -0.1156 0.062 Uiso 1 calc R . . 
C18 C 1.1658(3) 0.8873(3) -0.1236(2) 0.0544(8) Uani 1 d . . . 
H18 H 1.1523 0.8863 -0.1902 0.065 Uiso 1 calc R . . 
C19 C 1.2665(3) 0.9273(2) -0.0683(2) 0.0471(7) Uani 1 d . . . 
C20 C 1.2862(3) 0.9311(2) 0.0303(2) 0.0528(8) Uani 1 d . . . 
H20 H 1.3532 0.9587 0.0668 0.063 Uiso 1 calc R . . 
C21 C 1.2060(3) 0.8938(2) 0.0749(2) 0.0520(8) Uani 1 d . . . 
H21 H 1.2187 0.8962 0.1414 0.062 Uiso 1 calc R . . 
C22 C 1.3530(3) 0.9623(3) -0.1137(3) 0.0592(8) Uani 1 d . . . 
 
loop_ 
 _atom_site_aniso_label 
 _atom_site_aniso_U_11 
 _atom_site_aniso_U_22 
 _atom_site_aniso_U_33 
 _atom_site_aniso_U_23 
 _atom_site_aniso_U_13 
 _atom_site_aniso_U_12 
Ru 0.02760(12) 0.03365(13) 0.03191(13) 0.00106(8) 0.00627(8) -0.00180(8) 
Cl1 0.0456(4) 0.0574(4) 0.0338(3) -0.0014(3) 0.0074(3) -0.0071(3) 
Cl2 0.0374(3) 0.0529(4) 0.0524(4) 0.0058(3) 0.0098(3) 0.0092(3) 
N1 0.0370(11) 0.0383(12) 0.0430(12) -0.0009(10) 0.0133(10) -0.0054(9) 
N2 0.0424(12) 0.0374(12) 0.0496(13) -0.0038(10) 0.0187(11) -0.0085(10) 
N3 0.077(2) 0.103(3) 0.088(2) 0.007(2) 0.046(2) -0.013(2) 
C1 0.0598(19) 0.069(2) 0.0410(16) 0.0117(15) 0.0094(14) -0.0033(17) 
C2 0.059(2) 0.055(2) 0.062(2) -0.0156(16) 0.0149(16) 0.0022(15) 
C3 0.071(2) 0.0487(19) 0.079(2) 0.0153(17) 0.0075(19) -0.0155(17) 
C4 0.0468(18) 0.112(3) 0.0528(19) 0.006(2) 0.0182(15) -0.0208(19) 
C5 0.056(2) 0.093(3) 0.069(2) -0.023(2) 0.0162(17) 0.0198(19) 
C6 0.082(3) 0.0466(19) 0.079(3) 0.0091(17) 0.008(2) 0.0131(18) 
C7 0.0351(14) 0.0455(15) 0.0327(14) 0.0044(11) 0.0013(11) -0.0030(11) 
C8 0.0356(14) 0.0395(14) 0.0406(14) -0.0058(12) 0.0027(11) -0.0031(11) 
C9 0.0345(14) 0.0397(14) 0.0459(15) 0.0026(12) 0.0029(12) -0.0076(12) 
C10 0.0280(13) 0.0647(19) 0.0399(14) -0.0011(13) 0.0046(11) -0.0107(13) 
C11 0.0311(13) 0.0568(18) 0.0442(15) -0.0081(14) 0.0017(11) 0.0065(12) 
C12 0.0383(14) 0.0405(15) 0.0424(15) 0.0016(12) -0.0002(12) 0.0048(12) 
C13 0.0371(13) 0.0403(15) 0.0439(15) -0.0049(12) 0.0120(11) -0.0058(11) 
C14 0.0601(19) 0.0452(16) 0.0564(18) -0.0133(14) 0.0298(15) -0.0112(14) 
C15 0.0630(19) 0.0423(17) 0.0618(19) -0.0152(14) 0.0283(16) -0.0151(14) 
C16 0.0397(14) 0.0366(14) 0.0479(16) 0.0006(12) 0.0143(12) -0.0030(11) 
C17 0.0403(15) 0.0601(19) 0.0505(18) 0.0089(15) 0.0041(13) -0.0043(14) 
C18 0.0522(18) 0.066(2) 0.0458(17) 0.0131(15) 0.0135(14) 0.0014(16) 
C19 0.0469(17) 0.0395(16) 0.0594(18) 0.0073(13) 0.0215(14) -0.0008(12) 
C20 0.0505(18) 0.0517(18) 0.0583(19) -0.0109(14) 0.0172(15) -0.0200(14) 
C21 0.0564(19) 0.0544(18) 0.0475(17) -0.0067(14) 0.0173(14) -0.0195(15) 
C22 0.060(2) 0.058(2) 0.064(2) 0.0081(17) 0.0252(17) -0.0074(16) 
 
_geom_special_details 
; 
 All esds (except the esd in the dihedral angle between two l.s. planes) 
 are estimated using the full covariance matrix.  The cell esds are taken 
 into account individually in the estimation of esds in distances, angles 
 and torsion angles; correlations between esds in cell parameters are only 
 used when they are defined by crystal symmetry.  An approximate (isotropic) 
 treatment of cell esds is used for estimating esds involving l.s. planes. 
; 
 
loop_ 
 _geom_bond_atom_site_label_1 
 _geom_bond_atom_site_label_2 
 _geom_bond_distance 
 _geom_bond_site_symmetry_2 
 _geom_bond_publ_flag 
Ru N1 2.124(2) . ? 
Ru C12 2.181(3) . ? 
Ru C11 2.185(3) . ? 
Ru C8 2.194(3) . ? 
Ru C9 2.200(3) . ? 
Ru C7 2.202(3) . ? 
Ru C10 2.203(3) . ? 
Ru Cl1 2.4181(8) . ? 
Ru Cl2 2.4236(7) . ? 
N1 C13 1.319(3) . ? 
N1 C14 1.381(4) . ? 
N2 C13 1.355(3) . ? 
N2 C15 1.380(4) . ? 
N2 C16 1.429(3) . ? 
N3 C22 1.126(4) . ? 
C1 C7 1.504(4) . ? 
C1 H1A 0.9600 . ? 
C1 H1B 0.9600 . ? 
C1 H1C 0.9600 . ? 
C2 C8 1.517(4) . ? 
C2 H2A 0.9600 . ? 
C2 H2B 0.9600 . ? 
C2 H2C 0.9600 . ? 
C3 C9 1.517(4) . ? 
C3 H3A 0.9600 . ? 
C3 H3B 0.9600 . ? 
C3 H3C 0.9600 . ? 
C4 C10 1.512(4) . ? 
C4 H4A 0.9600 . ? 
C4 H4B 0.9600 . ? 
C4 H4C 0.9600 . ? 
C5 C11 1.513(4) . ? 
C5 H5A 0.9600 . ? 
C5 H5B 0.9600 . ? 
C5 H5C 0.9600 . ? 
C6 C12 1.520(4) . ? 
C6 H6A 0.9600 . ? 
C6 H6B 0.9600 . ? 
C6 H6C 0.9600 . ? 
C7 C8 1.422(4) . ? 
C7 C12 1.442(4) . ? 
C8 C9 1.432(4) . ? 
C9 C10 1.415(4) . ? 
C10 C11 1.442(5) . ? 
C11 C12 1.415(4) . ? 
C13 H13 0.9300 . ? 
C14 C15 1.349(4) . ? 
C14 H14 0.9300 . ? 
C15 H15 0.9300 . ? 
C16 C17 1.381(4) . ? 
C16 C21 1.384(4) . ? 
C17 C18 1.381(4) . ? 
C17 H17 0.9300 . ? 
C18 C19 1.392(5) . ? 
C18 H18 0.9300 . ? 
C19 C20 1.378(5) . ? 
C19 C22 1.445(4) . ? 
C20 C21 1.383(4) . ? 
C20 H20 0.9300 . ? 
C21 H21 0.9300 . ? 
 
loop_ 
 _geom_angle_atom_site_label_1 
 _geom_angle_atom_site_label_2 
 _geom_angle_atom_site_label_3 
 _geom_angle 
 _geom_angle_site_symmetry_1 
 _geom_angle_site_symmetry_3 
 _geom_angle_publ_flag 
N1 Ru C12 89.90(10) . . ? 
N1 Ru C11 112.16(10) . . ? 
C12 Ru C11 37.83(11) . . ? 
N1 Ru C8 125.39(9) . . ? 
C12 Ru C8 68.75(10) . . ? 
C11 Ru C8 81.16(10) . . ? 
N1 Ru C9 163.36(10) . . ? 
C12 Ru C9 81.58(10) . . ? 
C11 Ru C9 68.88(11) . . ? 
C8 Ru C9 38.05(10) . . ? 
N1 Ru C7 95.81(9) . . ? 
C12 Ru C7 38.43(10) . . ? 
C11 Ru C7 68.78(10) . . ? 
C8 Ru C7 37.75(10) . . ? 
C9 Ru C7 68.70(10) . . ? 
N1 Ru C10 149.48(11) . . ? 
C12 Ru C10 68.61(11) . . ? 
C11 Ru C10 38.36(12) . . ? 
C8 Ru C10 67.96(10) . . ? 
C9 Ru C10 37.49(11) . . ? 
C7 Ru C10 80.88(10) . . ? 
N1 Ru Cl1 86.51(6) . . ? 
C12 Ru Cl1 123.00(8) . . ? 
C11 Ru Cl1 92.87(8) . . ? 
C8 Ru Cl1 147.52(8) . . ? 
C9 Ru Cl1 110.12(8) . . ? 
C7 Ru Cl1 161.03(8) . . ? 
C10 Ru Cl1 87.58(8) . . ? 
N1 Ru Cl2 85.14(6) . . ? 
C12 Ru Cl2 148.30(8) . . ? 
C11 Ru Cl2 162.71(9) . . ? 
C8 Ru Cl2 88.86(7) . . ? 
C9 Ru Cl2 94.60(8) . . ? 
C7 Ru Cl2 110.96(8) . . ? 
C10 Ru Cl2 124.55(9) . . ? 
Cl1 Ru Cl2 87.98(3) . . ? 
C13 N1 C14 106.5(2) . . ? 
C13 N1 Ru 125.66(19) . . ? 
C14 N1 Ru 127.81(18) . . ? 
C13 N2 C15 107.3(2) . . ? 
C13 N2 C16 126.6(2) . . ? 
C15 N2 C16 126.0(2) . . ? 
C7 C1 H1A 109.5 . . ? 
C7 C1 H1B 109.5 . . ? 
H1A C1 H1B 109.5 . . ? 
C7 C1 H1C 109.5 . . ? 
H1A C1 H1C 109.5 . . ? 
H1B C1 H1C 109.5 . . ? 
C8 C2 H2A 109.5 . . ? 
C8 C2 H2B 109.5 . . ? 
H2A C2 H2B 109.5 . . ? 
C8 C2 H2C 109.5 . . ? 
H2A C2 H2C 109.5 . . ? 
H2B C2 H2C 109.5 . . ? 
C9 C3 H3A 109.5 . . ? 
C9 C3 H3B 109.5 . . ? 
H3A C3 H3B 109.5 . . ? 
C9 C3 H3C 109.5 . . ? 
H3A C3 H3C 109.5 . . ? 
H3B C3 H3C 109.5 . . ? 
C10 C4 H4A 109.5 . . ? 
C10 C4 H4B 109.5 . . ? 
H4A C4 H4B 109.5 . . ? 
C10 C4 H4C 109.5 . . ? 
H4A C4 H4C 109.5 . . ? 
H4B C4 H4C 109.5 . . ? 
C11 C5 H5A 109.5 . . ? 
C11 C5 H5B 109.5 . . ? 
H5A C5 H5B 109.5 . . ? 
C11 C5 H5C 109.5 . . ? 
H5A C5 H5C 109.5 . . ? 
H5B C5 H5C 109.5 . . ? 
C12 C6 H6A 109.5 . . ? 
C12 C6 H6B 109.5 . . ? 
H6A C6 H6B 109.5 . . ? 
C12 C6 H6C 109.5 . . ? 
H6A C6 H6C 109.5 . . ? 
H6B C6 H6C 109.5 . . ? 
C8 C7 C12 119.2(2) . . ? 
C8 C7 C1 119.9(3) . . ? 
C12 C7 C1 120.9(3) . . ? 
C8 C7 Ru 70.83(15) . . ? 
C12 C7 Ru 70.03(15) . . ? 
C1 C7 Ru 131.9(2) . . ? 
C7 C8 C9 121.0(3) . . ? 
C7 C8 C2 118.7(3) . . ? 
C9 C8 C2 120.4(3) . . ? 
C7 C8 Ru 71.43(15) . . ? 
C9 C8 Ru 71.21(15) . . ? 
C2 C8 Ru 129.9(2) . . ? 
C10 C9 C8 119.3(3) . . ? 
C10 C9 C3 120.7(3) . . ? 
C8 C9 C3 120.0(3) . . ? 
C10 C9 Ru 71.37(16) . . ? 
C8 C9 Ru 70.74(15) . . ? 
C3 C9 Ru 127.6(2) . . ? 
C9 C10 C11 120.5(3) . . ? 
C9 C10 C4 119.8(3) . . ? 
C11 C10 C4 119.6(3) . . ? 
C9 C10 Ru 71.14(15) . . ? 
C11 C10 Ru 70.17(15) . . ? 
C4 C10 Ru 129.8(2) . . ? 
C12 C11 C10 119.7(3) . . ? 
C12 C11 C5 120.9(3) . . ? 
C10 C11 C5 119.3(3) . . ? 
C12 C11 Ru 70.93(15) . . ? 
C10 C11 Ru 71.48(15) . . ? 
C5 C11 Ru 128.3(2) . . ? 
C11 C12 C7 120.2(3) . . ? 
C11 C12 C6 120.7(3) . . ? 
C7 C12 C6 119.0(3) . . ? 
C11 C12 Ru 71.24(15) . . ? 
C7 C12 Ru 71.54(15) . . ? 
C6 C12 Ru 129.3(2) . . ? 
N1 C13 N2 110.4(2) . . ? 
N1 C13 H13 124.8 . . ? 
N2 C13 H13 124.8 . . ? 
C15 C14 N1 109.4(3) . . ? 
C15 C14 H14 125.3 . . ? 
N1 C14 H14 125.3 . . ? 
C14 C15 N2 106.4(3) . . ? 
C14 C15 H15 126.8 . . ? 
N2 C15 H15 126.8 . . ? 
C17 C16 C21 121.0(3) . . ? 
C17 C16 N2 120.3(2) . . ? 
C21 C16 N2 118.7(3) . . ? 
C16 C17 C18 119.5(3) . . ? 
C16 C17 H17 120.3 . . ? 
C18 C17 H17 120.3 . . ? 
C17 C18 C19 119.7(3) . . ? 
C17 C18 H18 120.1 . . ? 
C19 C18 H18 120.1 . . ? 
C20 C19 C18 120.5(3) . . ? 
C20 C19 C22 119.3(3) . . ? 
C18 C19 C22 120.2(3) . . ? 
C19 C20 C21 119.9(3) . . ? 
C19 C20 H20 120.1 . . ? 
C21 C20 H20 120.1 . . ? 
C20 C21 C16 119.5(3) . . ? 
C20 C21 H21 120.3 . . ? 
C16 C21 H21 120.3 . . ? 
N3 C22 C19 178.1(4) . . ? 
 
loop_ 
 _geom_torsion_atom_site_label_1 
 _geom_torsion_atom_site_label_2 
 _geom_torsion_atom_site_label_3 
 _geom_torsion_atom_site_label_4 
 _geom_torsion 
 _geom_torsion_site_symmetry_1 
 _geom_torsion_site_symmetry_2 
 _geom_torsion_site_symmetry_3 
 _geom_torsion_site_symmetry_4 
 _geom_torsion_publ_flag 
C12 Ru N1 C13 -87.7(2) . . . . ? 
C11 Ru N1 C13 -119.1(2) . . . . ? 
C8 Ru N1 C13 -24.2(3) . . . . ? 
C9 Ru N1 C13 -28.9(5) . . . . ? 
C7 Ru N1 C13 -49.7(2) . . . . ? 
C10 Ru N1 C13 -131.6(2) . . . . ? 
Cl1 Ru N1 C13 149.2(2) . . . . ? 
Cl2 Ru N1 C13 60.9(2) . . . . ? 
C12 Ru N1 C14 90.7(3) . . . . ? 
C11 Ru N1 C14 59.3(3) . . . . ? 
C8 Ru N1 C14 154.2(2) . . . . ? 
C9 Ru N1 C14 149.5(3) . . . . ? 
C7 Ru N1 C14 128.7(3) . . . . ? 
C10 Ru N1 C14 46.8(3) . . . . ? 
Cl1 Ru N1 C14 -32.4(2) . . . . ? 
Cl2 Ru N1 C14 -120.7(2) . . . . ? 
N1 Ru C7 C8 145.03(16) . . . . ? 
C12 Ru C7 C8 -132.5(2) . . . . ? 
C11 Ru C7 C8 -103.42(18) . . . . ? 
C9 Ru C7 C8 -28.70(16) . . . . ? 
C10 Ru C7 C8 -65.58(17) . . . . ? 
Cl1 Ru C7 C8 -118.8(2) . . . . ? 
Cl2 Ru C7 C8 58.03(16) . . . . ? 
N1 Ru C7 C12 -82.47(16) . . . . ? 
C11 Ru C7 C12 29.07(17) . . . . ? 
C8 Ru C7 C12 132.5(2) . . . . ? 
C9 Ru C7 C12 103.80(18) . . . . ? 
C10 Ru C7 C12 66.92(17) . . . . ? 
Cl1 Ru C7 C12 13.7(3) . . . . ? 
Cl2 Ru C7 C12 -169.47(14) . . . . ? 
N1 Ru C7 C1 31.7(3) . . . . ? 
C12 Ru C7 C1 114.1(3) . . . . ? 
C11 Ru C7 C1 143.2(3) . . . . ? 
C8 Ru C7 C1 -113.4(3) . . . . ? 
C9 Ru C7 C1 -142.1(3) . . . . ? 
C10 Ru C7 C1 -178.9(3) . . . . ? 
Cl1 Ru C7 C1 127.9(3) . . . . ? 
Cl2 Ru C7 C1 -55.3(3) . . . . ? 
C12 C7 C8 C9 0.7(4) . . . . ? 
C1 C7 C8 C9 -178.8(3) . . . . ? 
Ru C7 C8 C9 53.3(2) . . . . ? 
C12 C7 C8 C2 -178.5(3) . . . . ? 
C1 C7 C8 C2 2.0(4) . . . . ? 
Ru C7 C8 C2 -125.9(2) . . . . ? 
C12 C7 C8 Ru -52.5(2) . . . . ? 
C1 C7 C8 Ru 128.0(3) . . . . ? 
N1 Ru C8 C7 -44.38(19) . . . . ? 
C12 Ru C8 C7 29.45(16) . . . . ? 
C11 Ru C8 C7 66.58(17) . . . . ? 
C9 Ru C8 C7 133.5(2) . . . . ? 
C10 Ru C8 C7 104.10(18) . . . . ? 
Cl1 Ru C8 C7 147.96(14) . . . . ? 
Cl2 Ru C8 C7 -127.59(15) . . . . ? 
N1 Ru C8 C9 -177.83(15) . . . . ? 
C12 Ru C8 C9 -104.00(18) . . . . ? 
C11 Ru C8 C9 -66.87(17) . . . . ? 
C7 Ru C8 C9 -133.5(2) . . . . ? 
C10 Ru C8 C9 -29.35(16) . . . . ? 
Cl1 Ru C8 C9 14.5(2) . . . . ? 
Cl2 Ru C8 C9 98.96(15) . . . . ? 
N1 Ru C8 C2 67.9(3) . . . . ? 
C12 Ru C8 C2 141.7(3) . . . . ? 
C11 Ru C8 C2 178.8(3) . . . . ? 
C9 Ru C8 C2 -114.3(3) . . . . ? 
C7 Ru C8 C2 112.3(3) . . . . ? 
C10 Ru C8 C2 -143.6(3) . . . . ? 
Cl1 Ru C8 C2 -99.8(3) . . . . ? 
Cl2 Ru C8 C2 -15.3(3) . . . . ? 
C7 C8 C9 C10 0.9(4) . . . . ? 
C2 C8 C9 C10 -179.9(3) . . . . ? 
Ru C8 C9 C10 54.2(2) . . . . ? 
C7 C8 C9 C3 -176.4(3) . . . . ? 
C2 C8 C9 C3 2.8(4) . . . . ? 
Ru C8 C9 C3 -123.0(3) . . . . ? 
C7 C8 C9 Ru -53.4(2) . . . . ? 
C2 C8 C9 Ru 125.8(3) . . . . ? 
N1 Ru C9 C10 -125.5(3) . . . . ? 
C12 Ru C9 C10 -65.62(17) . . . . ? 
C11 Ru C9 C10 -28.63(16) . . . . ? 
C8 Ru C9 C10 -131.7(2) . . . . ? 
C7 Ru C9 C10 -103.22(18) . . . . ? 
Cl1 Ru C9 C10 56.53(17) . . . . ? 
Cl2 Ru C9 C10 146.07(15) . . . . ? 
N1 Ru C9 C8 6.2(4) . . . . ? 
C12 Ru C9 C8 66.09(17) . . . . ? 
C11 Ru C9 C8 103.07(17) . . . . ? 
C7 Ru C9 C8 28.49(15) . . . . ? 
C10 Ru C9 C8 131.7(2) . . . . ? 
Cl1 Ru C9 C8 -171.76(13) . . . . ? 
Cl2 Ru C9 C8 -82.23(15) . . . . ? 
N1 Ru C9 C3 119.7(4) . . . . ? 
C12 Ru C9 C3 179.6(3) . . . . ? 
C11 Ru C9 C3 -143.4(3) . . . . ? 
C8 Ru C9 C3 113.5(3) . . . . ? 
C7 Ru C9 C3 142.0(3) . . . . ? 
C10 Ru C9 C3 -114.8(3) . . . . ? 
Cl1 Ru C9 C3 -58.3(3) . . . . ? 
Cl2 Ru C9 C3 31.3(3) . . . . ? 
C8 C9 C10 C11 -2.1(4) . . . . ? 
C3 C9 C10 C11 175.2(3) . . . . ? 
Ru C9 C10 C11 51.9(2) . . . . ? 
C8 C9 C10 C4 -179.6(3) . . . . ? 
C3 C9 C10 C4 -2.4(4) . . . . ? 
Ru C9 C10 C4 -125.7(3) . . . . ? 
C8 C9 C10 Ru -53.9(2) . . . . ? 
C3 C9 C10 Ru 123.3(3) . . . . ? 
N1 Ru C10 C9 152.68(18) . . . . ? 
C12 Ru C10 C9 104.61(18) . . . . ? 
C11 Ru C10 C9 133.9(2) . . . . ? 
C8 Ru C10 C9 29.76(16) . . . . ? 
C7 Ru C10 C9 66.73(17) . . . . ? 
Cl1 Ru C10 C9 -128.37(16) . . . . ? 
Cl2 Ru C10 C9 -42.50(18) . . . . ? 
N1 Ru C10 C11 18.8(3) . . . . ? 
C12 Ru C10 C11 -29.30(16) . . . . ? 
C8 Ru C10 C11 -104.15(17) . . . . ? 
C9 Ru C10 C11 -133.9(2) . . . . ? 
C7 Ru C10 C11 -67.18(17) . . . . ? 
Cl1 Ru C10 C11 97.72(15) . . . . ? 
Cl2 Ru C10 C11 -176.41(13) . . . . ? 
N1 Ru C10 C4 -93.8(4) . . . . ? 
C12 Ru C10 C4 -141.8(4) . . . . ? 
C11 Ru C10 C4 -112.5(4) . . . . ? 
C8 Ru C10 C4 143.3(4) . . . . ? 
C9 Ru C10 C4 113.6(4) . . . . ? 
C7 Ru C10 C4 -179.7(3) . . . . ? 
Cl1 Ru C10 C4 -14.8(3) . . . . ? 
Cl2 Ru C10 C4 71.1(3) . . . . ? 
C9 C10 C11 C12 1.7(4) . . . . ? 
C4 C10 C11 C12 179.2(3) . . . . ? 
Ru C10 C11 C12 54.0(2) . . . . ? 
C9 C10 C11 C5 -176.5(3) . . . . ? 
C4 C10 C11 C5 1.1(4) . . . . ? 
Ru C10 C11 C5 -124.2(3) . . . . ? 
C9 C10 C11 Ru -52.3(2) . . . . ? 
C4 C10 C11 Ru 125.3(2) . . . . ? 
N1 Ru C11 C12 58.15(18) . . . . ? 
C8 Ru C11 C12 -66.56(17) . . . . ? 
C9 Ru C11 C12 -103.97(18) . . . . ? 
C7 Ru C11 C12 -29.50(16) . . . . ? 
C10 Ru C11 C12 -132.0(2) . . . . ? 
Cl1 Ru C11 C12 145.55(16) . . . . ? 
Cl2 Ru C11 C12 -122.0(3) . . . . ? 
N1 Ru C11 C10 -169.84(15) . . . . ? 
C12 Ru C11 C10 132.0(2) . . . . ? 
C8 Ru C11 C10 65.45(16) . . . . ? 
C9 Ru C11 C10 28.04(16) . . . . ? 
C7 Ru C11 C10 102.51(17) . . . . ? 
Cl1 Ru C11 C10 -82.44(15) . . . . ? 
Cl2 Ru C11 C10 10.0(4) . . . . ? 
N1 Ru C11 C5 -56.7(3) . . . . ? 
C12 Ru C11 C5 -114.8(4) . . . . ? 
C8 Ru C11 C5 178.6(3) . . . . ? 
C9 Ru C11 C5 141.2(3) . . . . ? 
C7 Ru C11 C5 -144.3(3) . . . . ? 
C10 Ru C11 C5 113.1(4) . . . . ? 
Cl1 Ru C11 C5 30.7(3) . . . . ? 
Cl2 Ru C11 C5 123.1(3) . . . . ? 
C10 C11 C12 C7 0.0(4) . . . . ? 
C5 C11 C12 C7 178.1(3) . . . . ? 
Ru C11 C12 C7 54.2(2) . . . . ? 
C10 C11 C12 C6 -179.4(3) . . . . ? 
C5 C11 C12 C6 -1.3(4) . . . . ? 
Ru C11 C12 C6 -125.2(3) . . . . ? 
C10 C11 C12 Ru -54.2(2) . . . . ? 
C5 C11 C12 Ru 123.9(3) . . . . ? 
C8 C7 C12 C11 -1.1(4) . . . . ? 
C1 C7 C12 C11 178.3(3) . . . . ? 
Ru C7 C12 C11 -54.1(2) . . . . ? 
C8 C7 C12 C6 178.2(3) . . . . ? 
C1 C7 C12 C6 -2.3(4) . . . . ? 
Ru C7 C12 C6 125.3(3) . . . . ? 
C8 C7 C12 Ru 52.9(2) . . . . ? 
C1 C7 C12 Ru -127.6(3) . . . . ? 
N1 Ru C12 C11 -128.12(17) . . . . ? 
C8 Ru C12 C11 103.42(19) . . . . ? 
C9 Ru C12 C11 66.22(17) . . . . ? 
C7 Ru C12 C11 132.4(2) . . . . ? 
C10 Ru C12 C11 29.68(17) . . . . ? 
Cl1 Ru C12 C11 -42.35(19) . . . . ? 
Cl2 Ru C12 C11 151.33(15) . . . . ? 
N1 Ru C12 C7 99.50(16) . . . . ? 
C11 Ru C12 C7 -132.4(2) . . . . ? 
C8 Ru C12 C7 -28.97(15) . . . . ? 
C9 Ru C12 C7 -66.16(16) . . . . ? 
C10 Ru C12 C7 -102.70(18) . . . . ? 
Cl1 Ru C12 C7 -174.73(12) . . . . ? 
Cl2 Ru C12 C7 19.0(2) . . . . ? 
N1 Ru C12 C6 -13.3(3) . . . . ? 
C11 Ru C12 C6 114.8(4) . . . . ? 
C8 Ru C12 C6 -141.8(3) . . . . ? 
C9 Ru C12 C6 -179.0(3) . . . . ? 
C7 Ru C12 C6 -112.8(4) . . . . ? 
C10 Ru C12 C6 144.5(3) . . . . ? 
Cl1 Ru C12 C6 72.5(3) . . . . ? 
Cl2 Ru C12 C6 -93.8(3) . . . . ? 
C14 N1 C13 N2 -0.1(3) . . . . ? 
Ru N1 C13 N2 178.58(17) . . . . ? 
C15 N2 C13 N1 0.7(3) . . . . ? 
C16 N2 C13 N1 178.9(3) . . . . ? 
C13 N1 C14 C15 -0.5(4) . . . . ? 
Ru N1 C14 C15 -179.2(2) . . . . ? 
N1 C14 C15 N2 0.9(4) . . . . ? 
C13 N2 C15 C14 -0.9(4) . . . . ? 
C16 N2 C15 C14 -179.2(3) . . . . ? 
C13 N2 C16 C17 42.4(4) . . . . ? 
C15 N2 C16 C17 -139.7(3) . . . . ? 
C13 N2 C16 C21 -137.1(3) . . . . ? 
C15 N2 C16 C21 40.9(4) . . . . ? 
C21 C16 C17 C18 -0.3(5) . . . . ? 
N2 C16 C17 C18 -179.7(3) . . . . ? 
C16 C17 C18 C19 1.1(5) . . . . ? 
C17 C18 C19 C20 -1.4(5) . . . . ? 
C17 C18 C19 C22 176.7(3) . . . . ? 
C18 C19 C20 C21 0.8(5) . . . . ? 
C22 C19 C20 C21 -177.3(3) . . . . ? 
C19 C20 C21 C16 0.1(5) . . . . ? 
C17 C16 C21 C20 -0.3(5) . . . . ? 
N2 C16 C21 C20 179.1(3) . . . . ? 
C20 C19 C22 N3 0(13) . . . . ? 
C18 C19 C22 N3 -178(100) . . . . ? 
 
loop_ 
 _geom_hbond_atom_site_label_D 
 _geom_hbond_atom_site_label_H 
 _geom_hbond_atom_site_label_A 
 _geom_hbond_distance_DH 
 _geom_hbond_distance_HA 
 _geom_hbond_distance_DA 
 _geom_hbond_angle_DHA 
 _geom_hbond_site_symmetry_A 
C4 H4C Cl1  0.96 2.67 3.342(3) 127.3 . 
C17 H17 Cl1  0.93 2.73 3.467(3) 137.1 4_575 
 
_diffrn_measured_fraction_theta_max    0.900 
_diffrn_reflns_theta_full              24.92 
_diffrn_measured_fraction_theta_full   0.900 
_refine_diff_density_max    0.395 
_refine_diff_density_min   -0.631 
_refine_diff_density_rms    0.065 
